# Supplementary material for: Marker-Free Genome Engineering in Amycolatopsis Using the pSAM2 Site-Specific Recombination System
Source: MDPI journal article supplement (doi:10.3390/microorganisms10040828), 2022-04-16

## File S2: Sequence data of marker-free *rif* cluster mutants

Nucleotide sequence and chromatograms obtained after Sanger sequencing of three DSM 40773  $\Delta rif::att1$  independent clones are provided hereafter. The 33 bp scar expected to be formed after excision is highlighted in green. The high quality of the sequence shown in the chromatograms confirmed the homogeneity of the samples.

>mut $\Delta$ rif-att1\_cl1-LS220\_I19.ab1

TTTTAAGTCAGTTCGCGAGTACCGCCGCAGGTCGGCCAGCGCCGCGCTGCGC  
TCGGCAGCGGCCTGCGCCTCGGCCGGAGACGGCAGGCGCACCGGGGGCAAC  
GCGGGGAAGAGCATCGACGTCGAGTTCGCACTCCTGGCACATGCGGGCCAG  
TCTGGCAGGTCGAACTACCCACGTTGGTAATGGCTCCCACCGGATATCTACCT  
CTTCGTCCCGAACGAAGCGCGCGATATCGTGGAAGGTGTTCTCGTAGGCCGG  
TGACGCGGCGGCGGGGCCGGTGGTTCCCCGGGCGGTTGGGTGCGGTGGACG  
GGAGA

>mut $\Delta$ rif-att1\_cl2-LS220\_A19.ab1

CGCTCGGAATGGAGCGTCAGTTCGCGACGTACCGCCGCAGGTCGGCCAGCGC  
CGCGCTGCGCTCGGCAGCGGCCTGCGCCTCGGCCGGAGACGGCAGGCGCAC  
CGGGGGCAACGCGGGAAGAGCATCGACGTCGAGTTCGCACTCCTGGCACAT  
GCGGGCCAGTCTGGCAGGTCGAACTACCCACGTTGGTAATGGCTCCCACCGG  
ATATCTACCTCTTCGTCCCGAACGAAGCGCGCGATATCGTGGAAGGTGTTCTC  
GTAGGCCGGTGACGCGGCGGCGGGGCCGGTGGTTCCCCGGGCGGTTGGGTGC  
CGTGACGGGAGA

>mut $\Delta$ rif-att1\_cl3-LS220\_G19.ab1

TGAAAAATCGTTCGCGACGTACCGCCGCAGGTCCGGCCCAGCCGCCGCCGCT  
TGCGCTCGGCAGCGGCCTGCGCTCTCGGCCCGGAGAACGGCAGGCGCACCG  
GGGGCAACGCGGGAAGAGCATCGACGTCGAGTTCGCACTCCTGGCACATGC  
GGGCCAGTCTGGCAGGTCGAACTACCCACGTTGGTAATGGCTCCCACCGGAT  
ATCTACCTCTTCGTCCCGAACGAAGCGCGCGATATCGTGGAAGGTGTTCTCGT  
AGGCCGGTGACGCGGCGGCGGGGCCGGTGGTTCCCCGGGCGGTTGGGTGCG  
GGGGACGGGAGA

File: mutΔrif-att1\_cl1-LS220.ab1  
Signal G:7320 A:6523 T:5924 C:16877  
Sample: mutΔrif-att1\_cl1-LS220  
315 bases in 3937 scans

Run Ended: Apr 8, 2021, 14:49:21  
Comment: 2424358-I19-EmmanuelleDarbon-50-502973328-ED1  
Lane: 72 Base spacing: 15.06  
Page 1 of 2

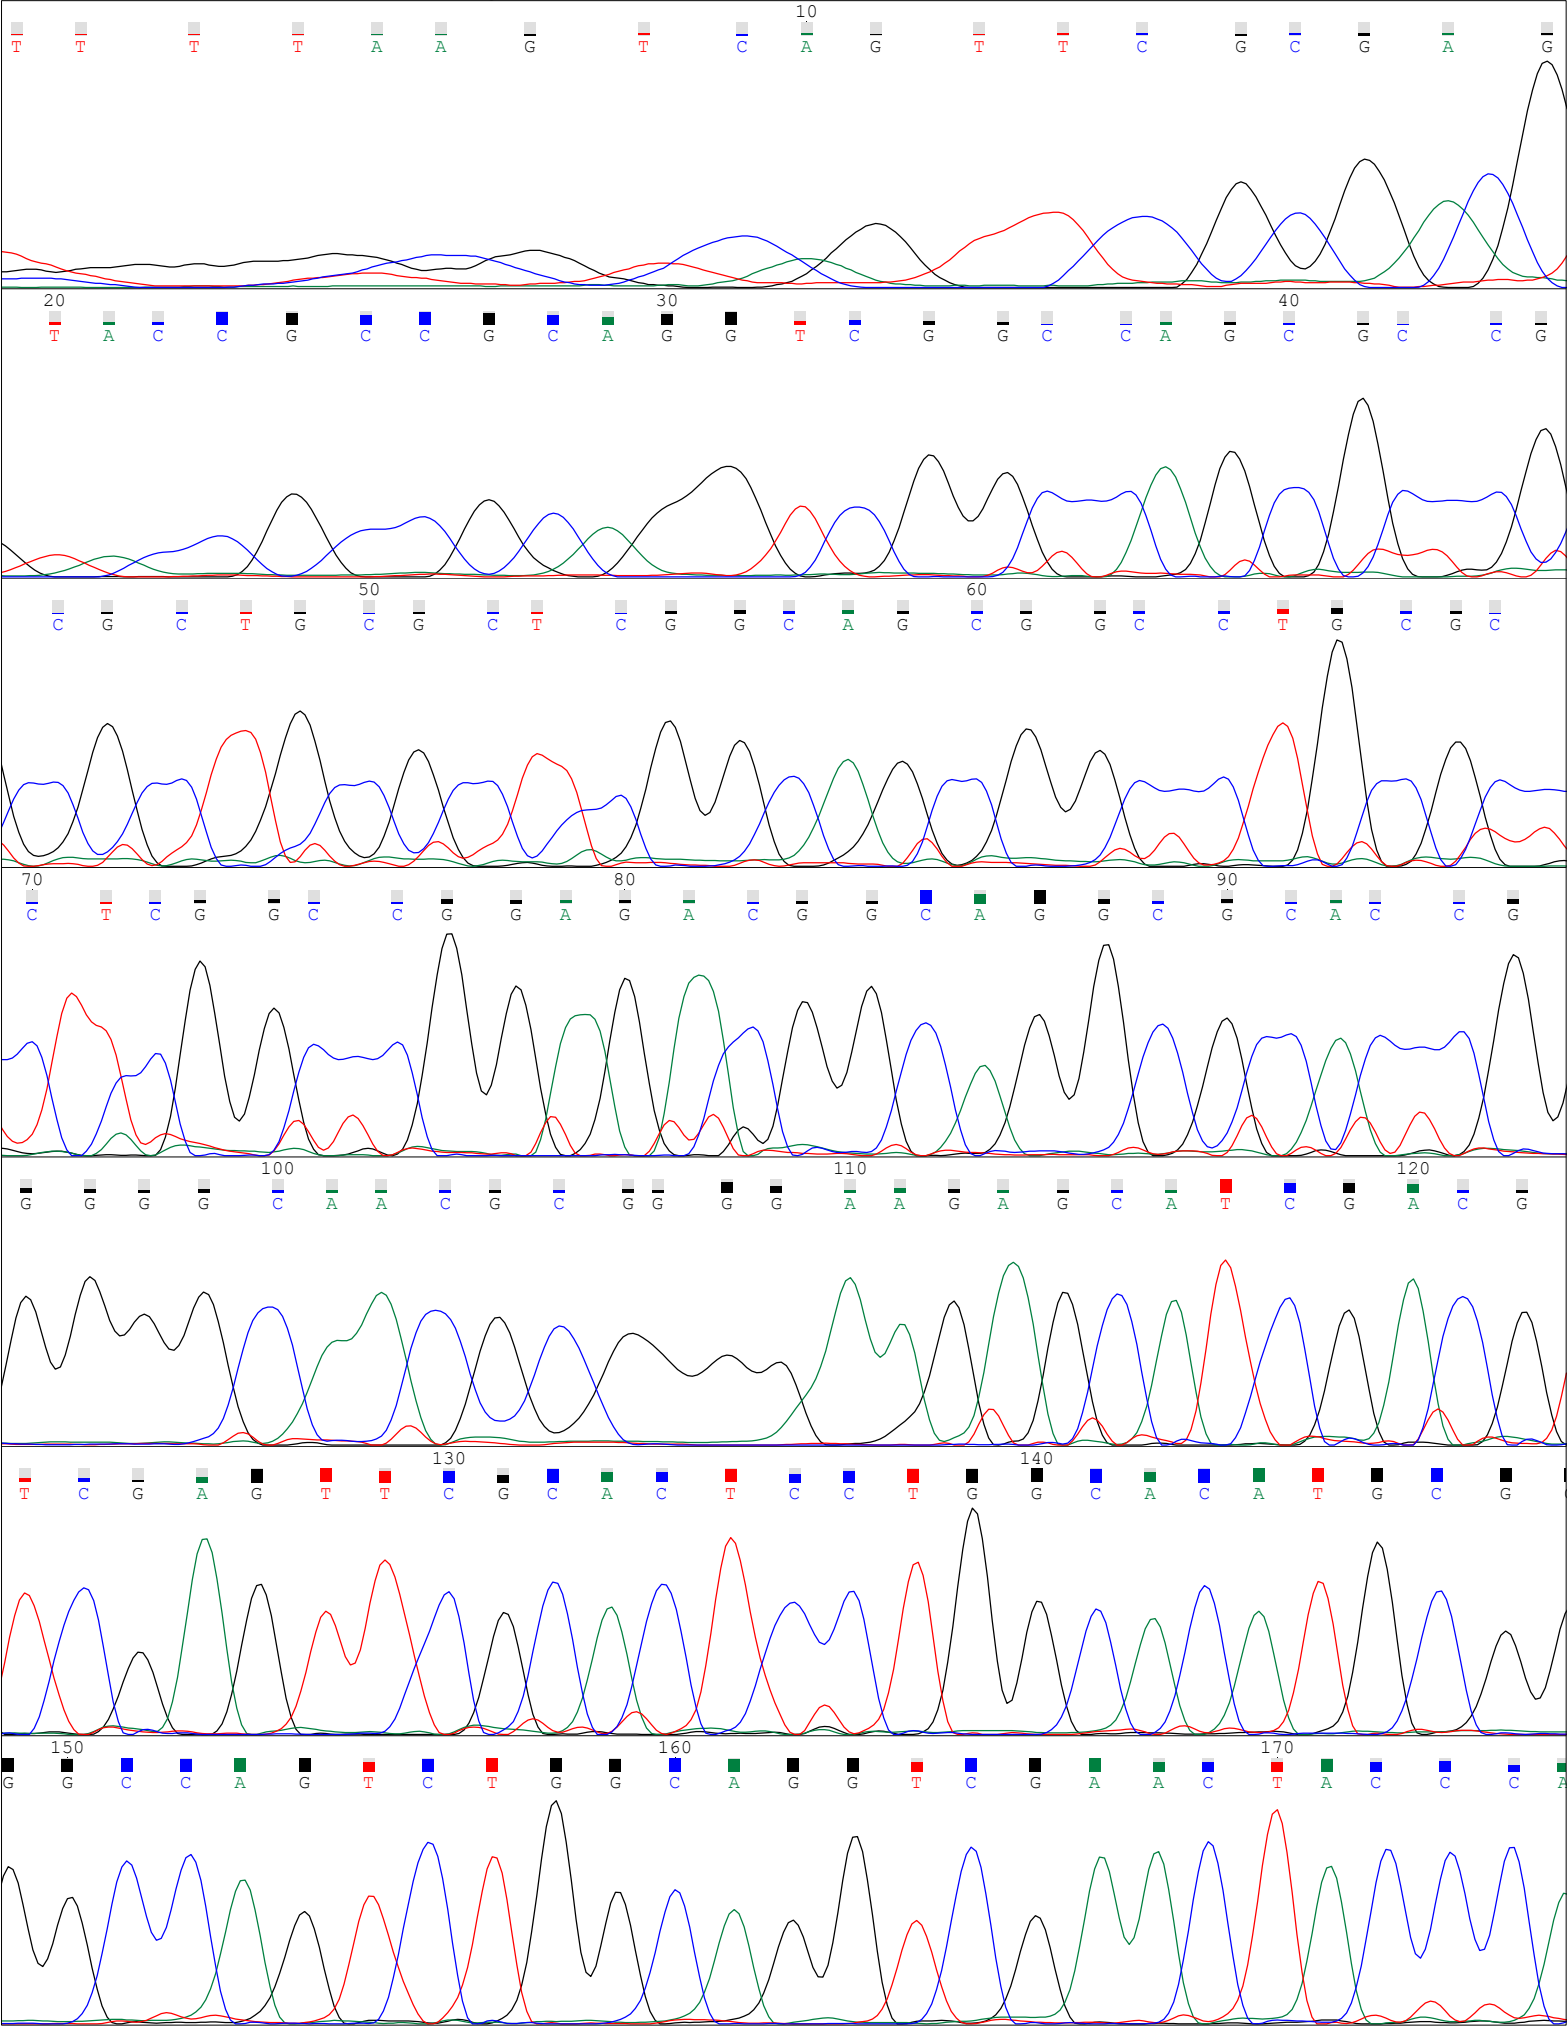

Run Ended: Apr 8, 2021, 14:49:21  
Comment: 2424358-I19-EmmanuelleDarbon-50-502973328-ED1  
Lane: 72 Base spacing: 15.06  
Page 2 of 2

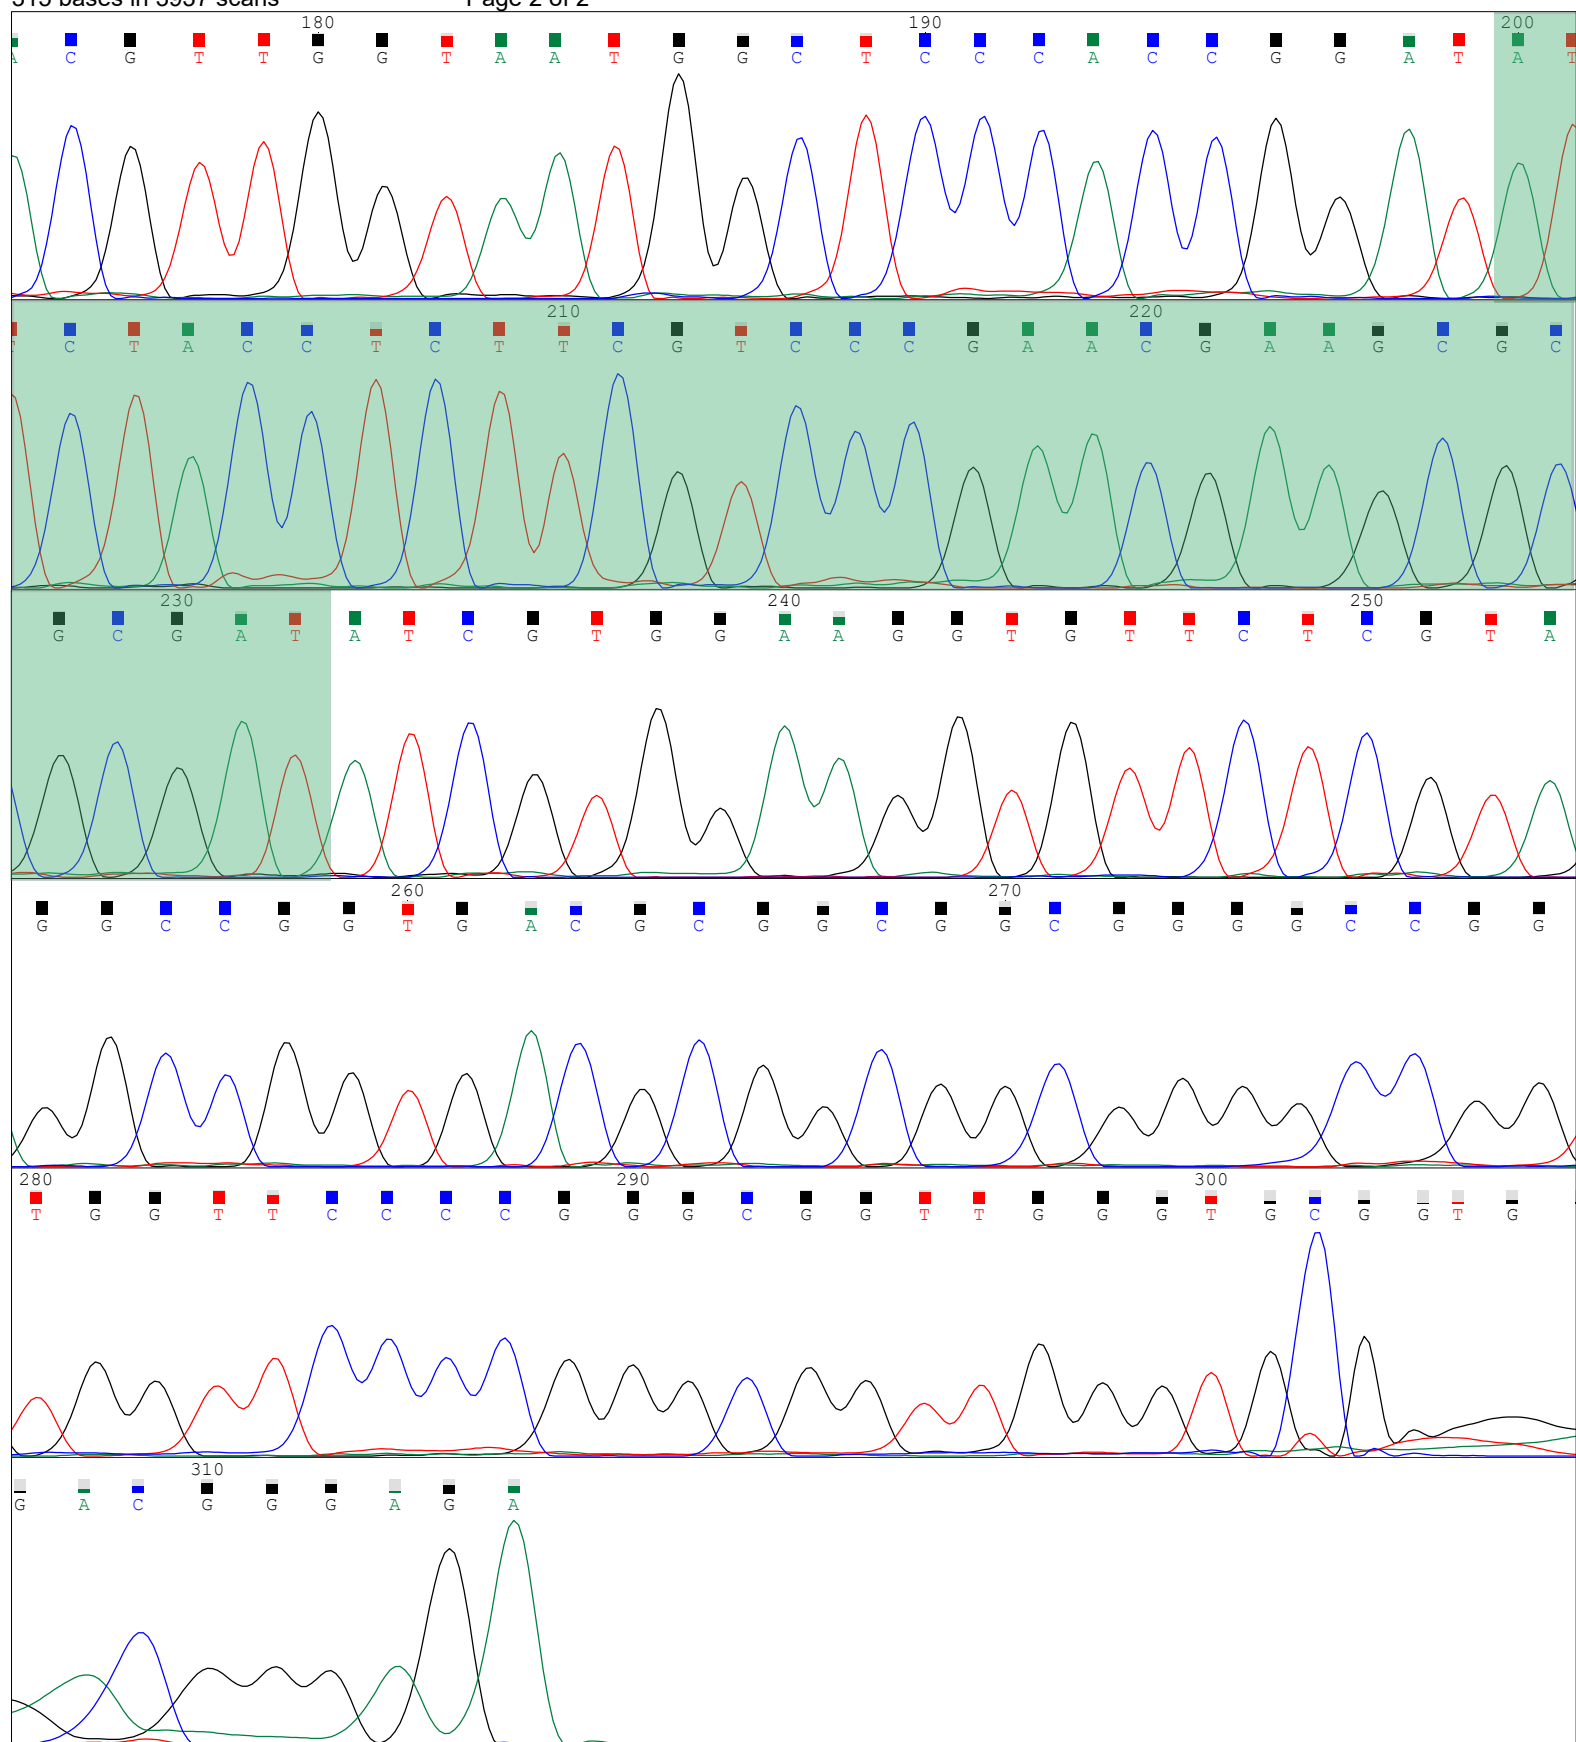



File: mutΔrif-att1\_cl2-LS220.ab1  
Signal G:1977 A:1760 T:1730 C:4825  
Sample: mutΔrif-att1\_cl2-LS220  
323 bases in 3951 scans

Run Ended: Apr 9, 2021, 1:33:59  
Comment: 2425017-A19-EmmanuelleDarbon-50-506386747-ED3  
Lane: 80 Base spacing: 16.08  
Page 2 of 2

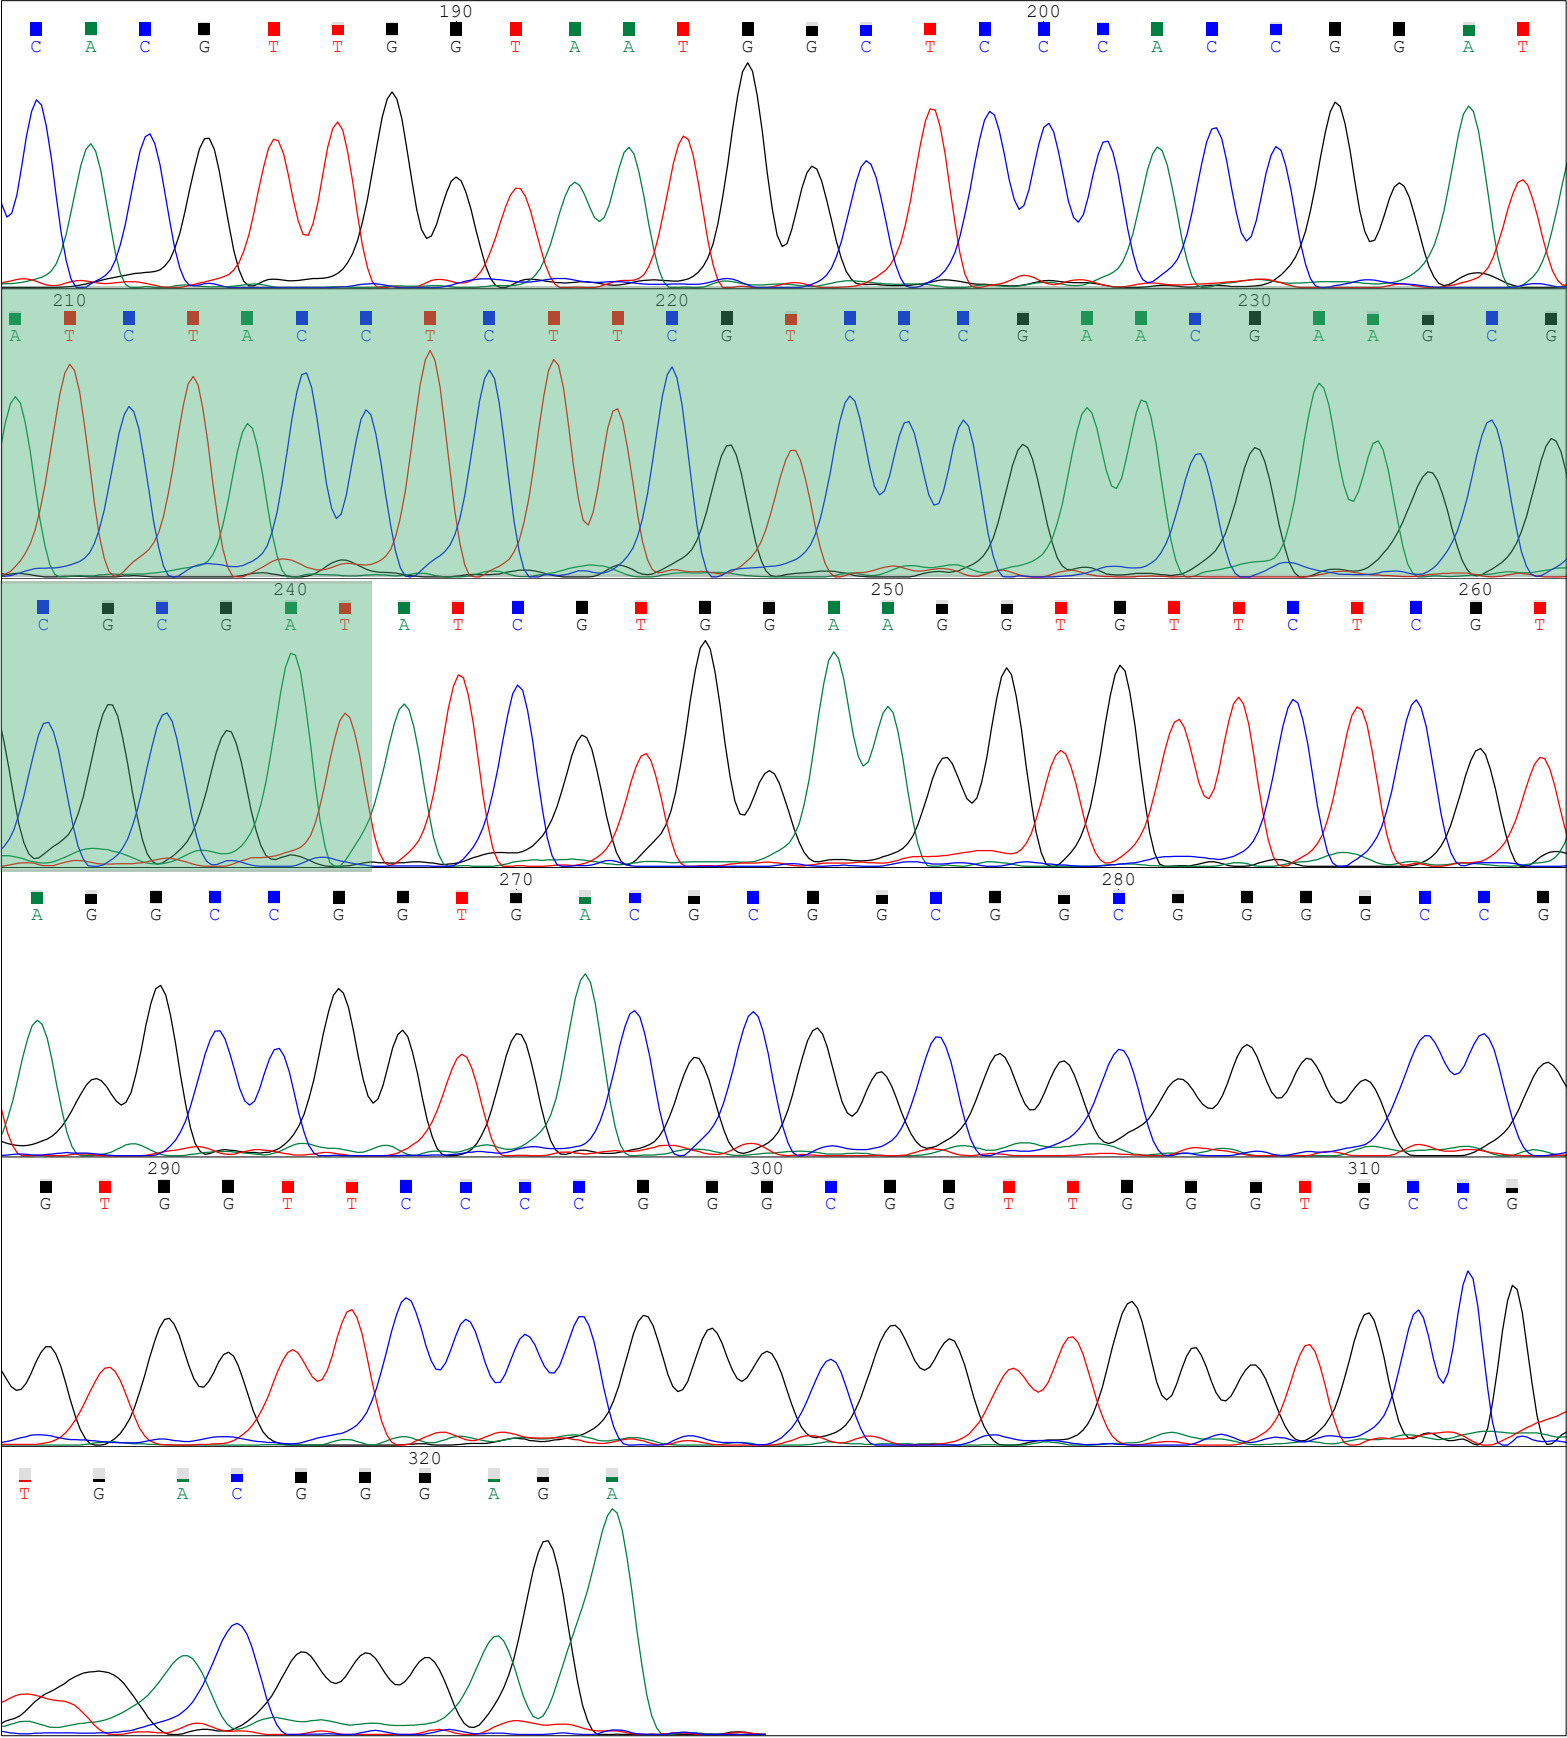

File: mutΔrif-att1\_cl3-LS220.ab1  
Signal G:10579 A:8710 T:8896 C:18815  
Sample: mutΔrif-att1\_cl3-LS220  
322 bases in 3935 scans

Run Ended: Apr 8, 2021, 14:49:21  
Comment: 2424358-G19-EmmanuelleDarbon-50-502973328-ED5  
Lane: 74 Base spacing: 15.11  
Page 1 of 2

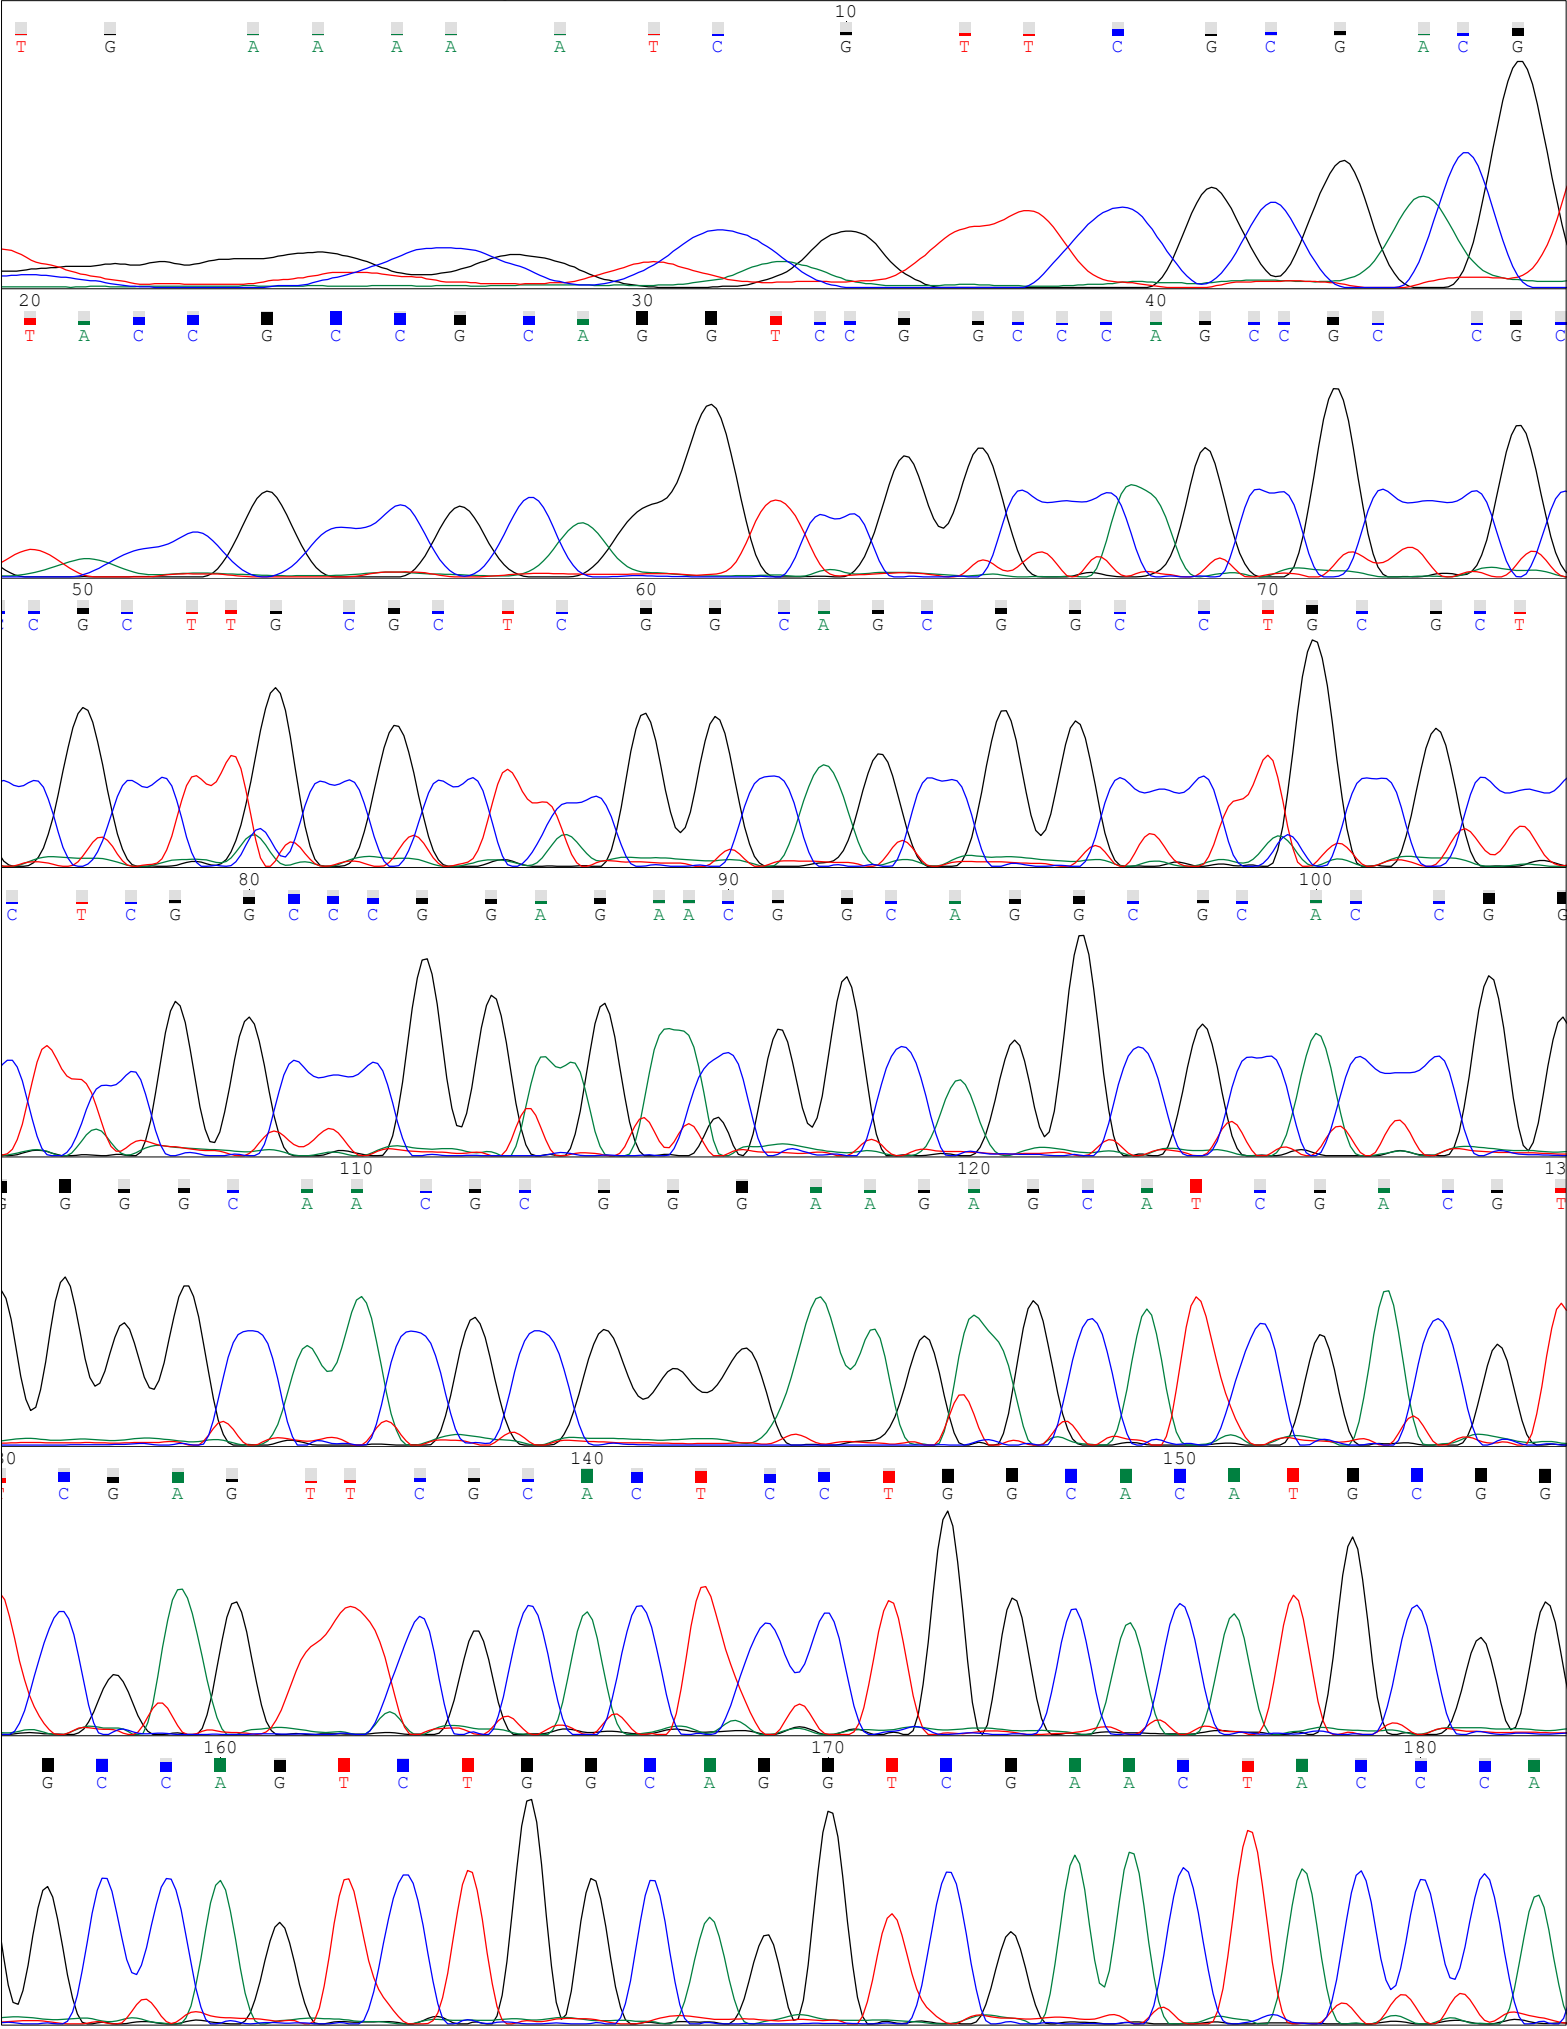

File: mutΔrif-att1\_cl3-LS220.ab1  
Signal G:10579 A:8710 T:8896 C:18815  
Sample: mutΔrif-att1\_cl3-LS220  
322 bases in 3935 scans

Run Ended: Apr 8, 2021, 14:49:21  
Comment: 2424358-G19-EmmanuelleDarbon-50-502973328-ED5  
Lane: 74 Base spacing: 15.11  
Page 2 of 2

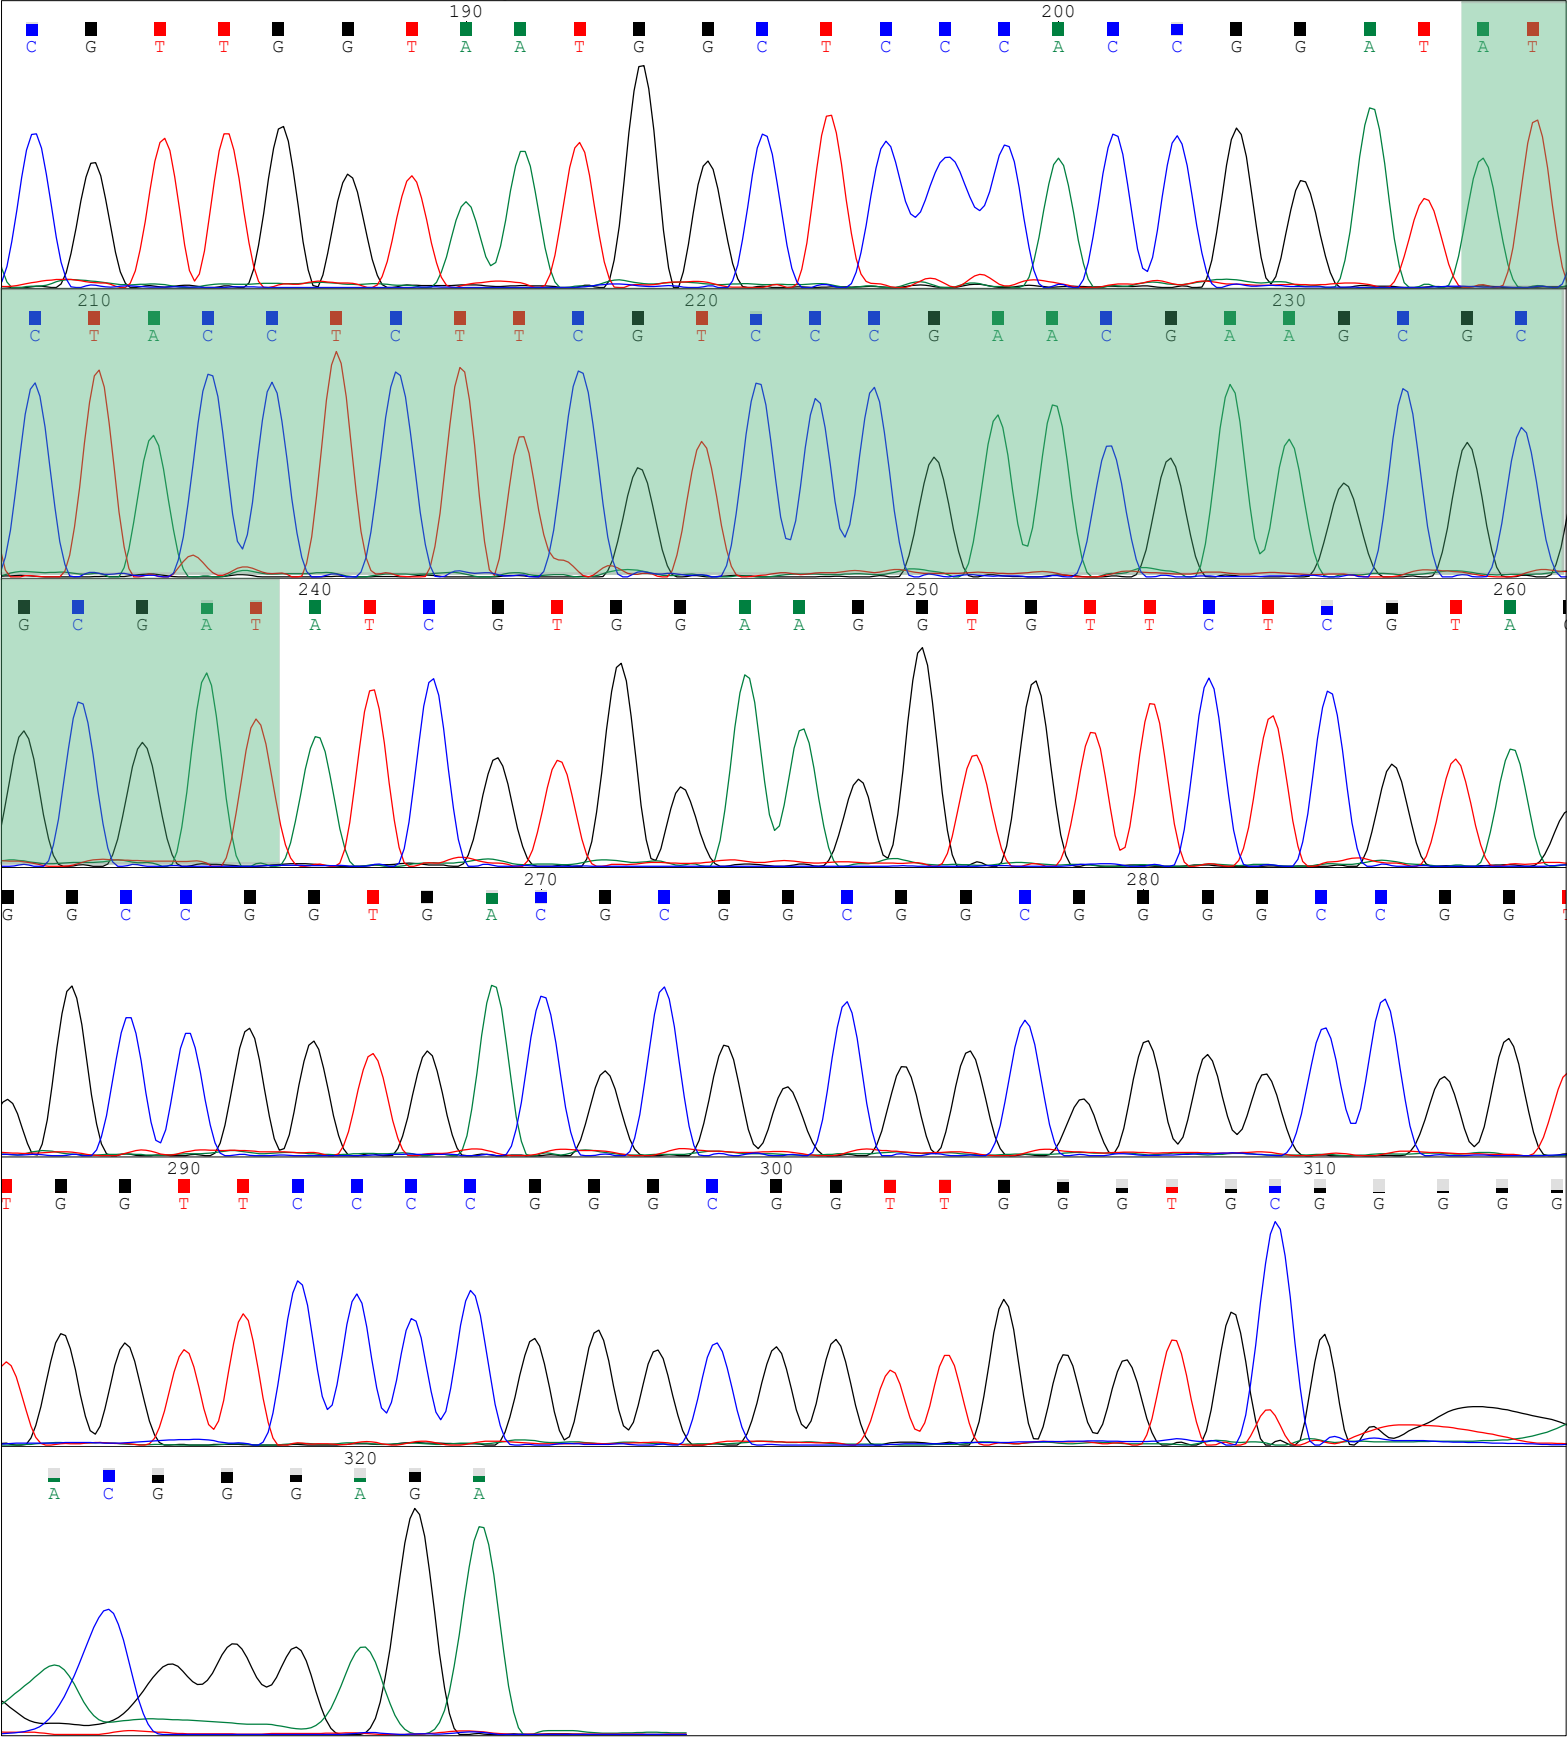

Supplement: s1 [file s1]
