# Supplementary material for: Marker-Free Genome Engineering in Amycolatopsis Using the pSAM2 Site-Specific Recombination System
Source: MDPI journal article supplement (doi:10.3390/microorganisms10040828), 2022-04-16

## File S1: Sequence data of marker-free *rifK* mutants

Nucleotide sequence and chromatograms obtained after Sanger sequencing of three DSM 40773  $\Delta rifK::att1$  independent clones are provided hereafter. The 33 bp scar expected to be formed after excision is highlighted in green. The high quality of the sequence shown in the chromatograms confirmed the homogeneity of the samples.

>mut $\Delta$ rifKatt1\_cl1-LS172\_G01.ab1

TCTTCGGCCTGGGTTGACGAACCGGCCACTACCAAGCCGAGGGATGTAAGCC  
GCCCCGGAGCCGATCTAGCCTGGTGGGGACGCTGATTCCGAGGCATTCCGGA  
CACGGCACGGGCTATTTCTGCAATTCGAACCCAGCGGAGATTTCGAGAAACC  
ATGAACGCGCGAAAGGCACCGGAATTCCCAGATCGCGCGCTTCGTTCTGGGAC  
GAAGAGGTAGATCTGAGCCGGAGCTGCACGCGACCGCCGAAATCATCGCCG  
ACGCCGTGGCGCGGGCATGAGTGATCCTCGA

>mut $\Delta$ rifKatt1\_cl2-LS172\_I01.ab1

CGTCTCGTGATTTCTTCGGCCTGGGTTGACGAACCGGCCACTACCAAGCCGA  
GGGATGTAAGCCGCTTCGGAGCCGATCTAGCCTGGTGGGGACGCTGATTCCG  
AGGCATTCCGGACACGGCACGGGCTATTTCTGCAATTCGAACCCAGCGGAG  
ATTCGAGAAACCATGAACGCGCGAAAGGCACCGGAATTCCCAGATCGCGCG  
CTTCGTTCTGGGACGAAGAGGTAGATCTGAGCCGGAGCTGCACGCGACCGCC  
GAAATCATCGCCGACGCCGTGGCGCGGGCTGAGGGATCCTCGA

> mut $\Delta$ rifKatt1\_cl3-LS172\_A01.ab1

CAAGTCATGGATCTATCGCGATTTCTTCGGCCTGGGTTGACGAACCGGCCCTA  
CCAGCCGAGGGATGTAAGCCGCTCGGAGCCGATCTAGCCTGGTGGGGACGC  
TGATTCCGAGGCATTCCGGCAGGCACGGGCTATTTCTGCAATTCGAACCCCA  
GCGGAGATTTCGAGAAACCATGAACGCGCGAAAGGCACCGGAATTCCCAGAT  
CGCGCGCTTCGTTCTGGGACGAAGAGGTAGATCTGAGCCGGAGCTGCACGCG  
ACCGCCGAAATCATCGCCGACGCCGTGGCGCGGGCTGGGGGATCCTCGAAA

File: mutΔrifKatt1\_cl1-LS172.ab1  
Signal G:5337 A:6281 T:4544 C:9796  
Sample: mutΔrifKatt1\_cl1-LS172  
290 bases in 3710 scans

Run Ended: Jan 7, 2021, 1:21:10  
Comment: 2389291-G01-EmmanuelleDarbon-50-463277508-ED1  
Lane: 9    Base spacing: 14.79  
Page 1 of 2

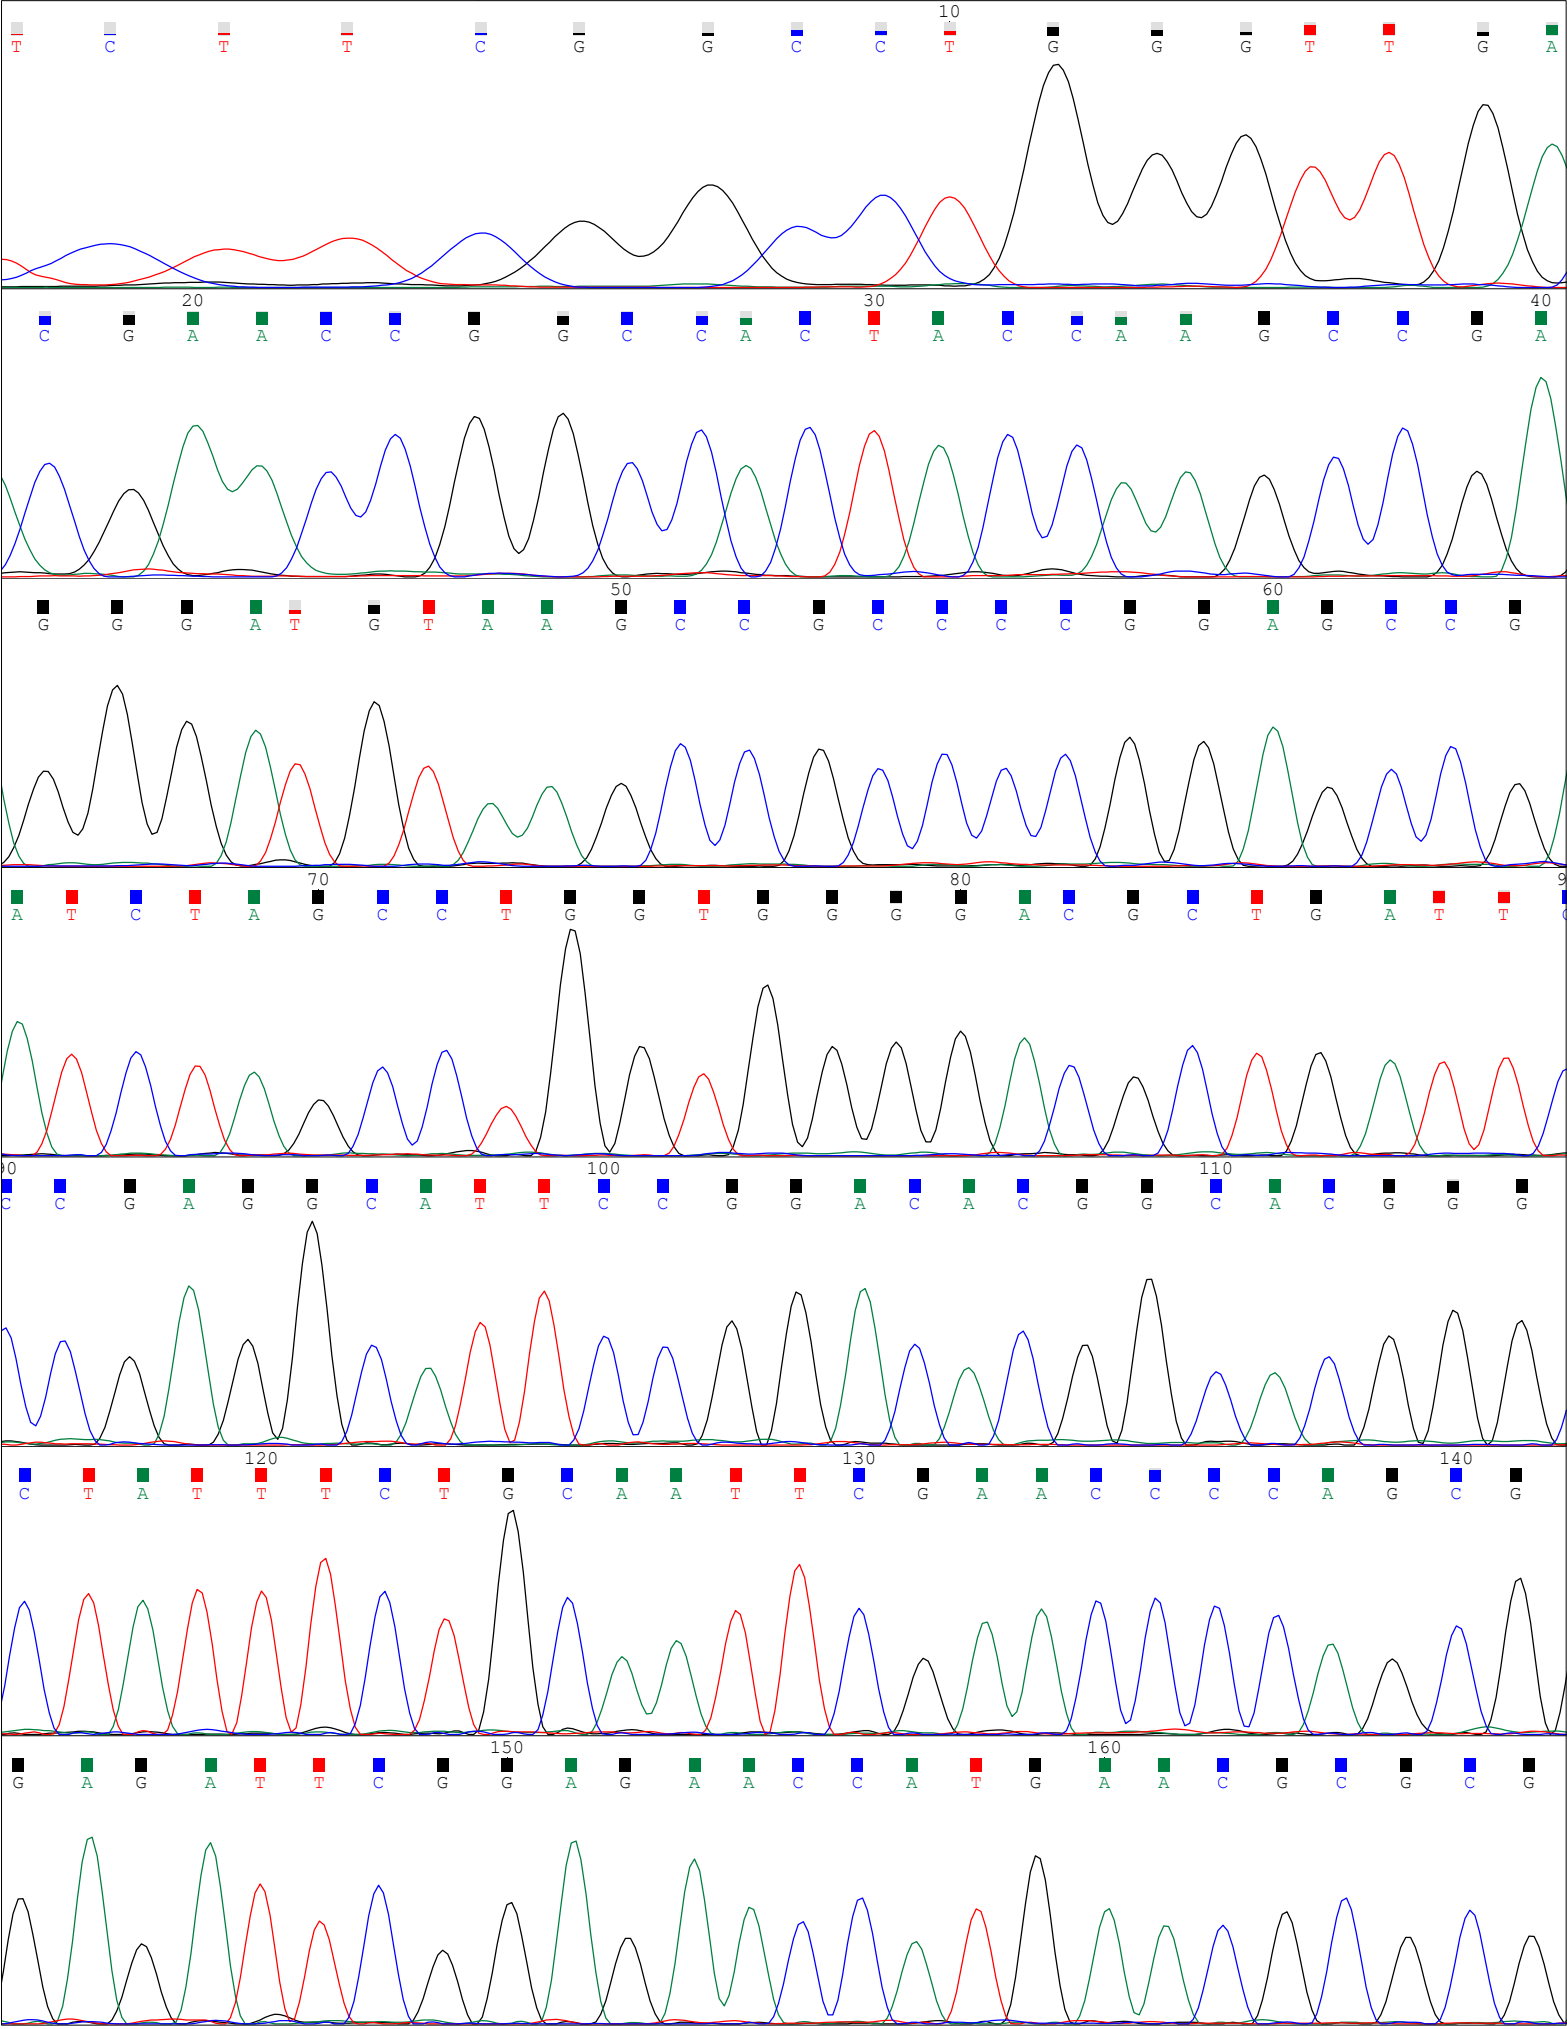

Run Ended: Jan 7, 2021, 1:21:10  
Comment: 2389291-G01-EmmanuelleDarbon-50-463277508-ED1  
Lane: 9 Base spacing: 14.79  
Page 2 of 2

Run Ended: Jan 7, 2021, 1:21:10  
Comment: 2389291-I01-EmmanuelleDarbon-50-463277508-ED2  
Lane: 7 Base spacing: 14.68  
Page 1 of 2

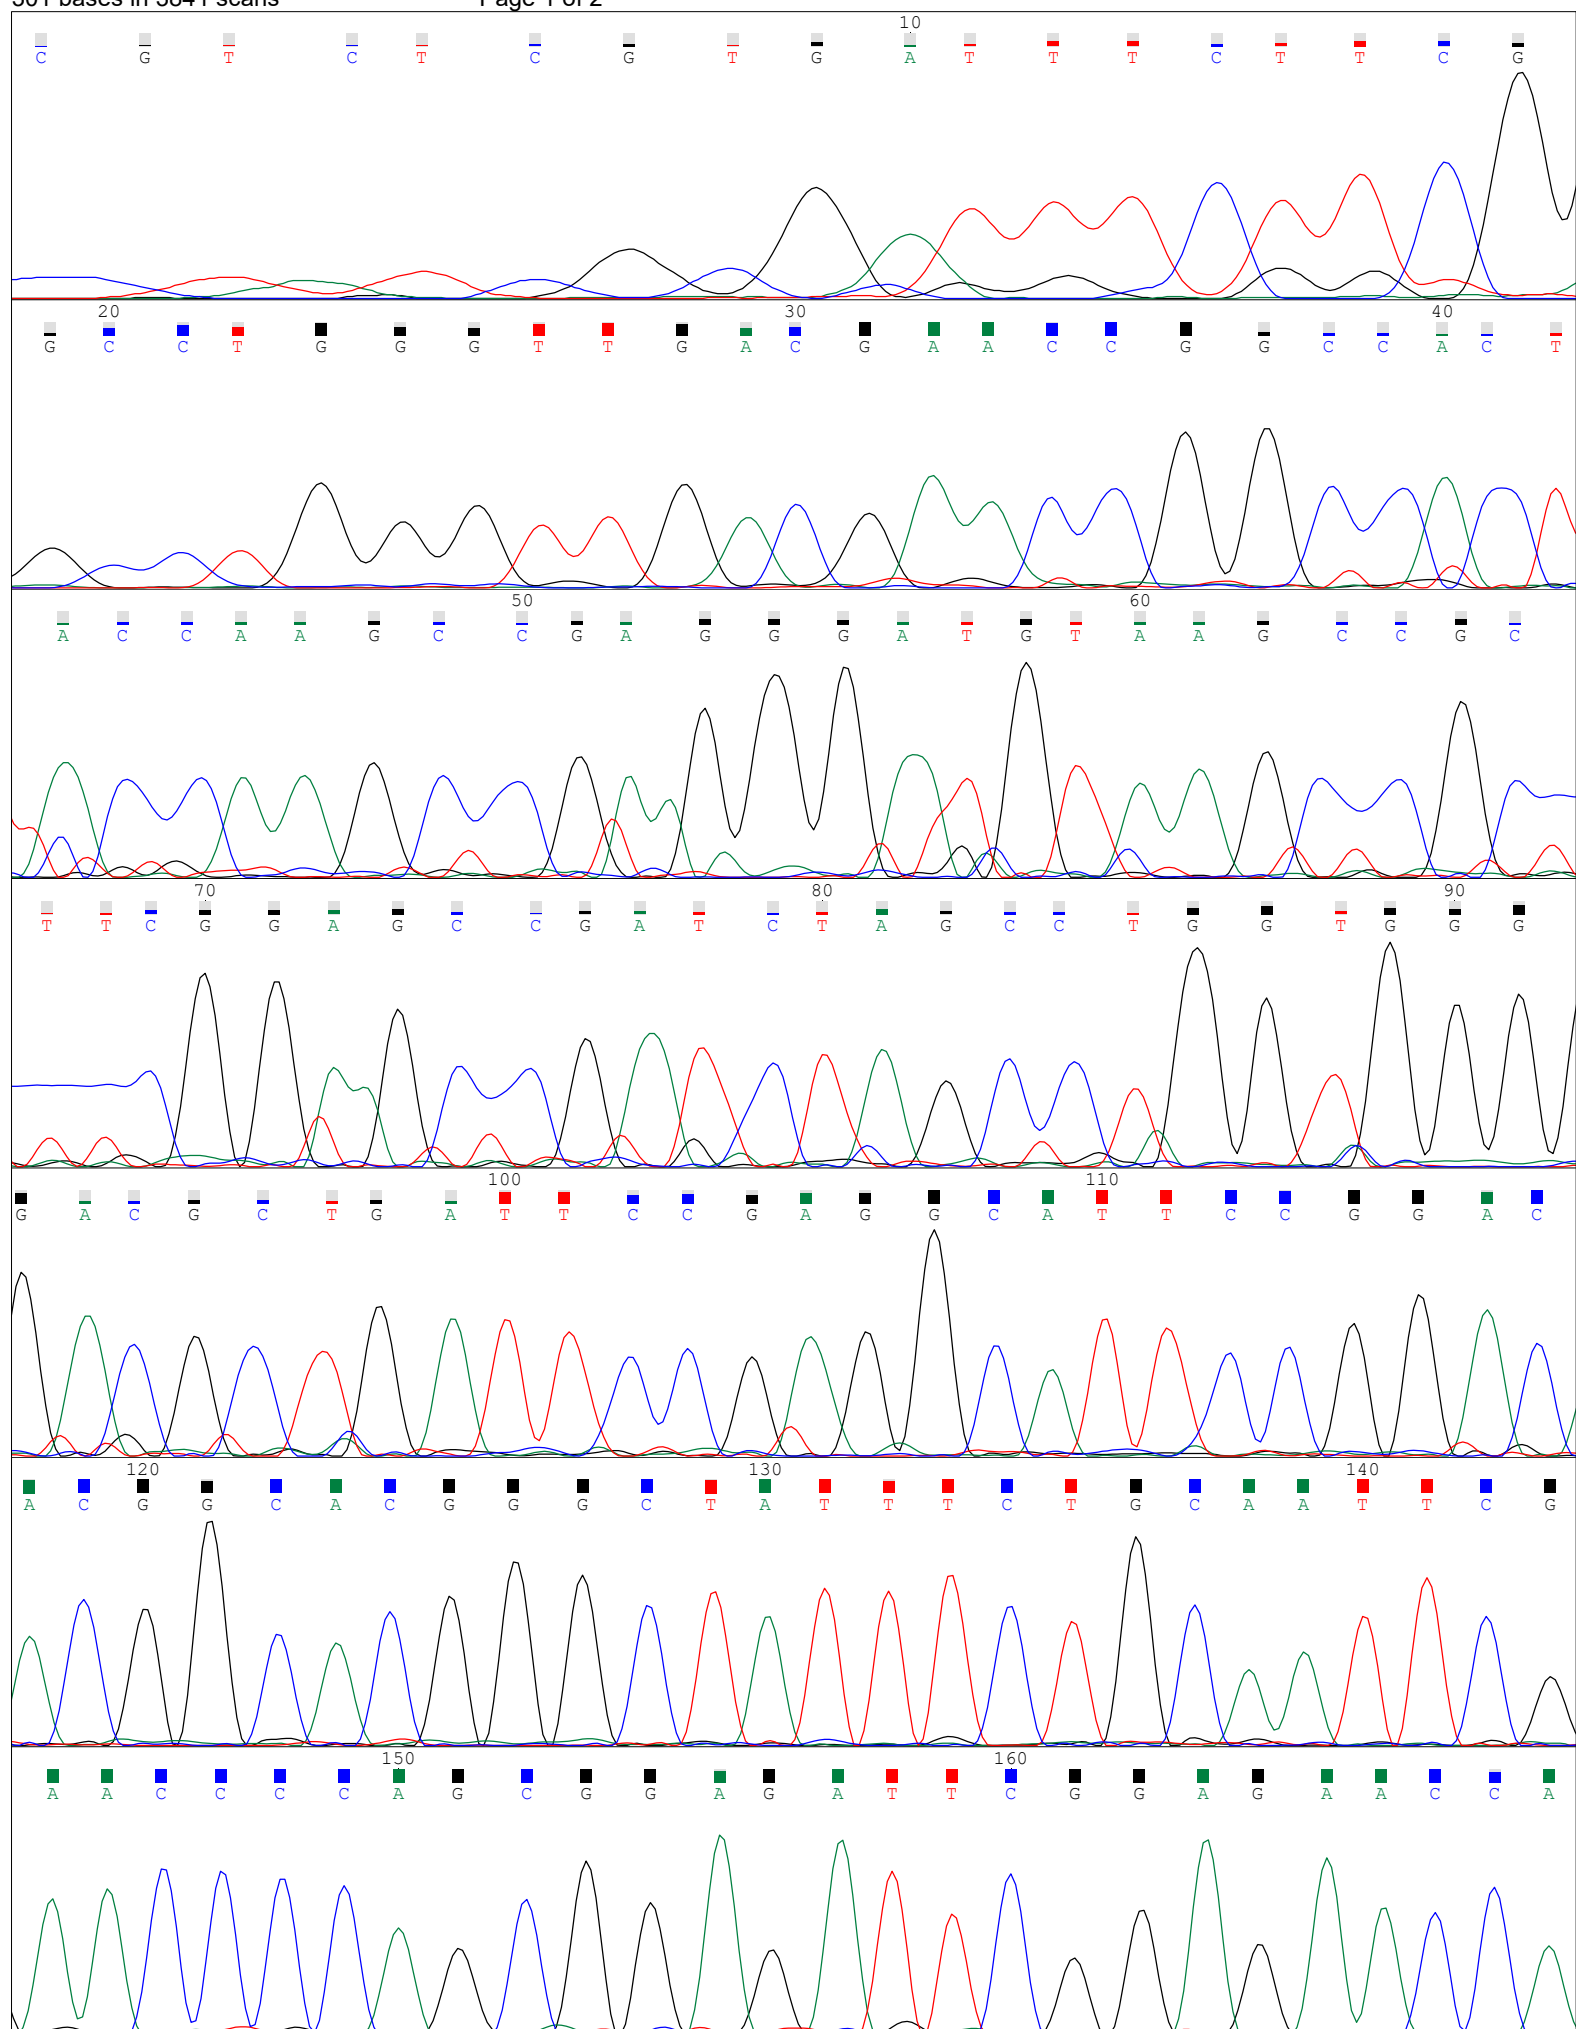

File: mutΔrifKatt1\_cl2-LS172.ab1  
Signal G:9720 A:11140 T:8657 C:16011  
Sample: mutΔrifKatt1\_cl2-LS172  
301 bases in 3841 scans

Run Ended: Jan 7, 2021, 1:21:10  
Comment: 2389291-I01-EmmanuelleDarbon-50-463277508-ED2  
Lane: 7 Base spacing: 14.68  
Page 2 of 2

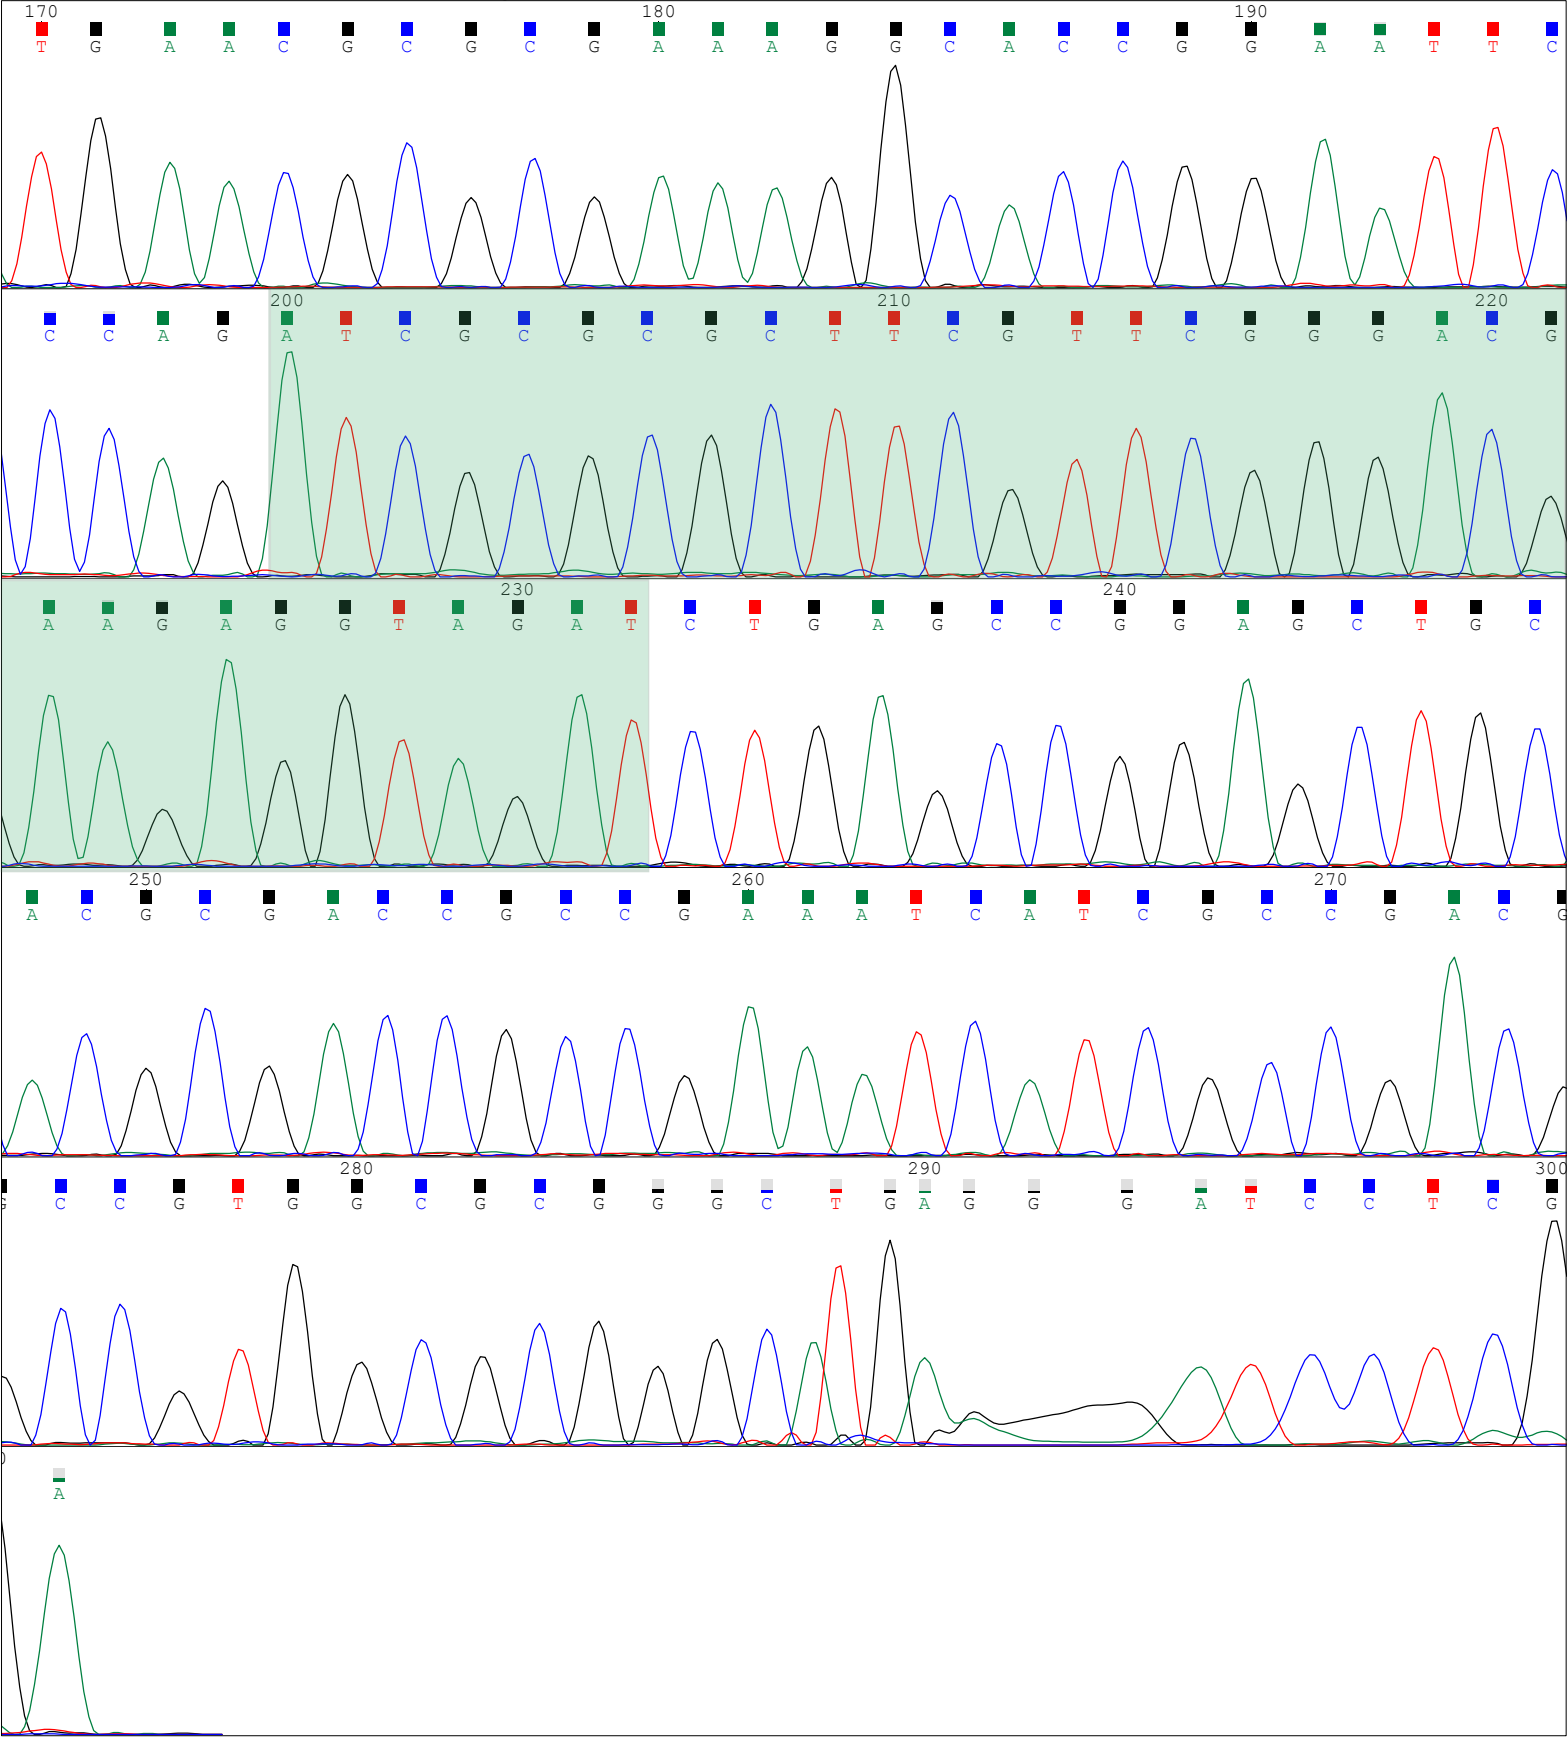

File: mutΔrifKatt1\_cl3-LS172.ab1  
Signal G:13771 A:15173 T:11163 C:19261  
Sample: mutΔrifKatt1\_cl3-LS172  
309 bases in 3978 scans

Run Ended: Jan 7, 2021, 1:21:10  
Comment: 2389291-A01-EmmanuelleDarbon-50-463277508-ED3  
Lane: 15 Base spacing: 14.45  
Page 1 of 2

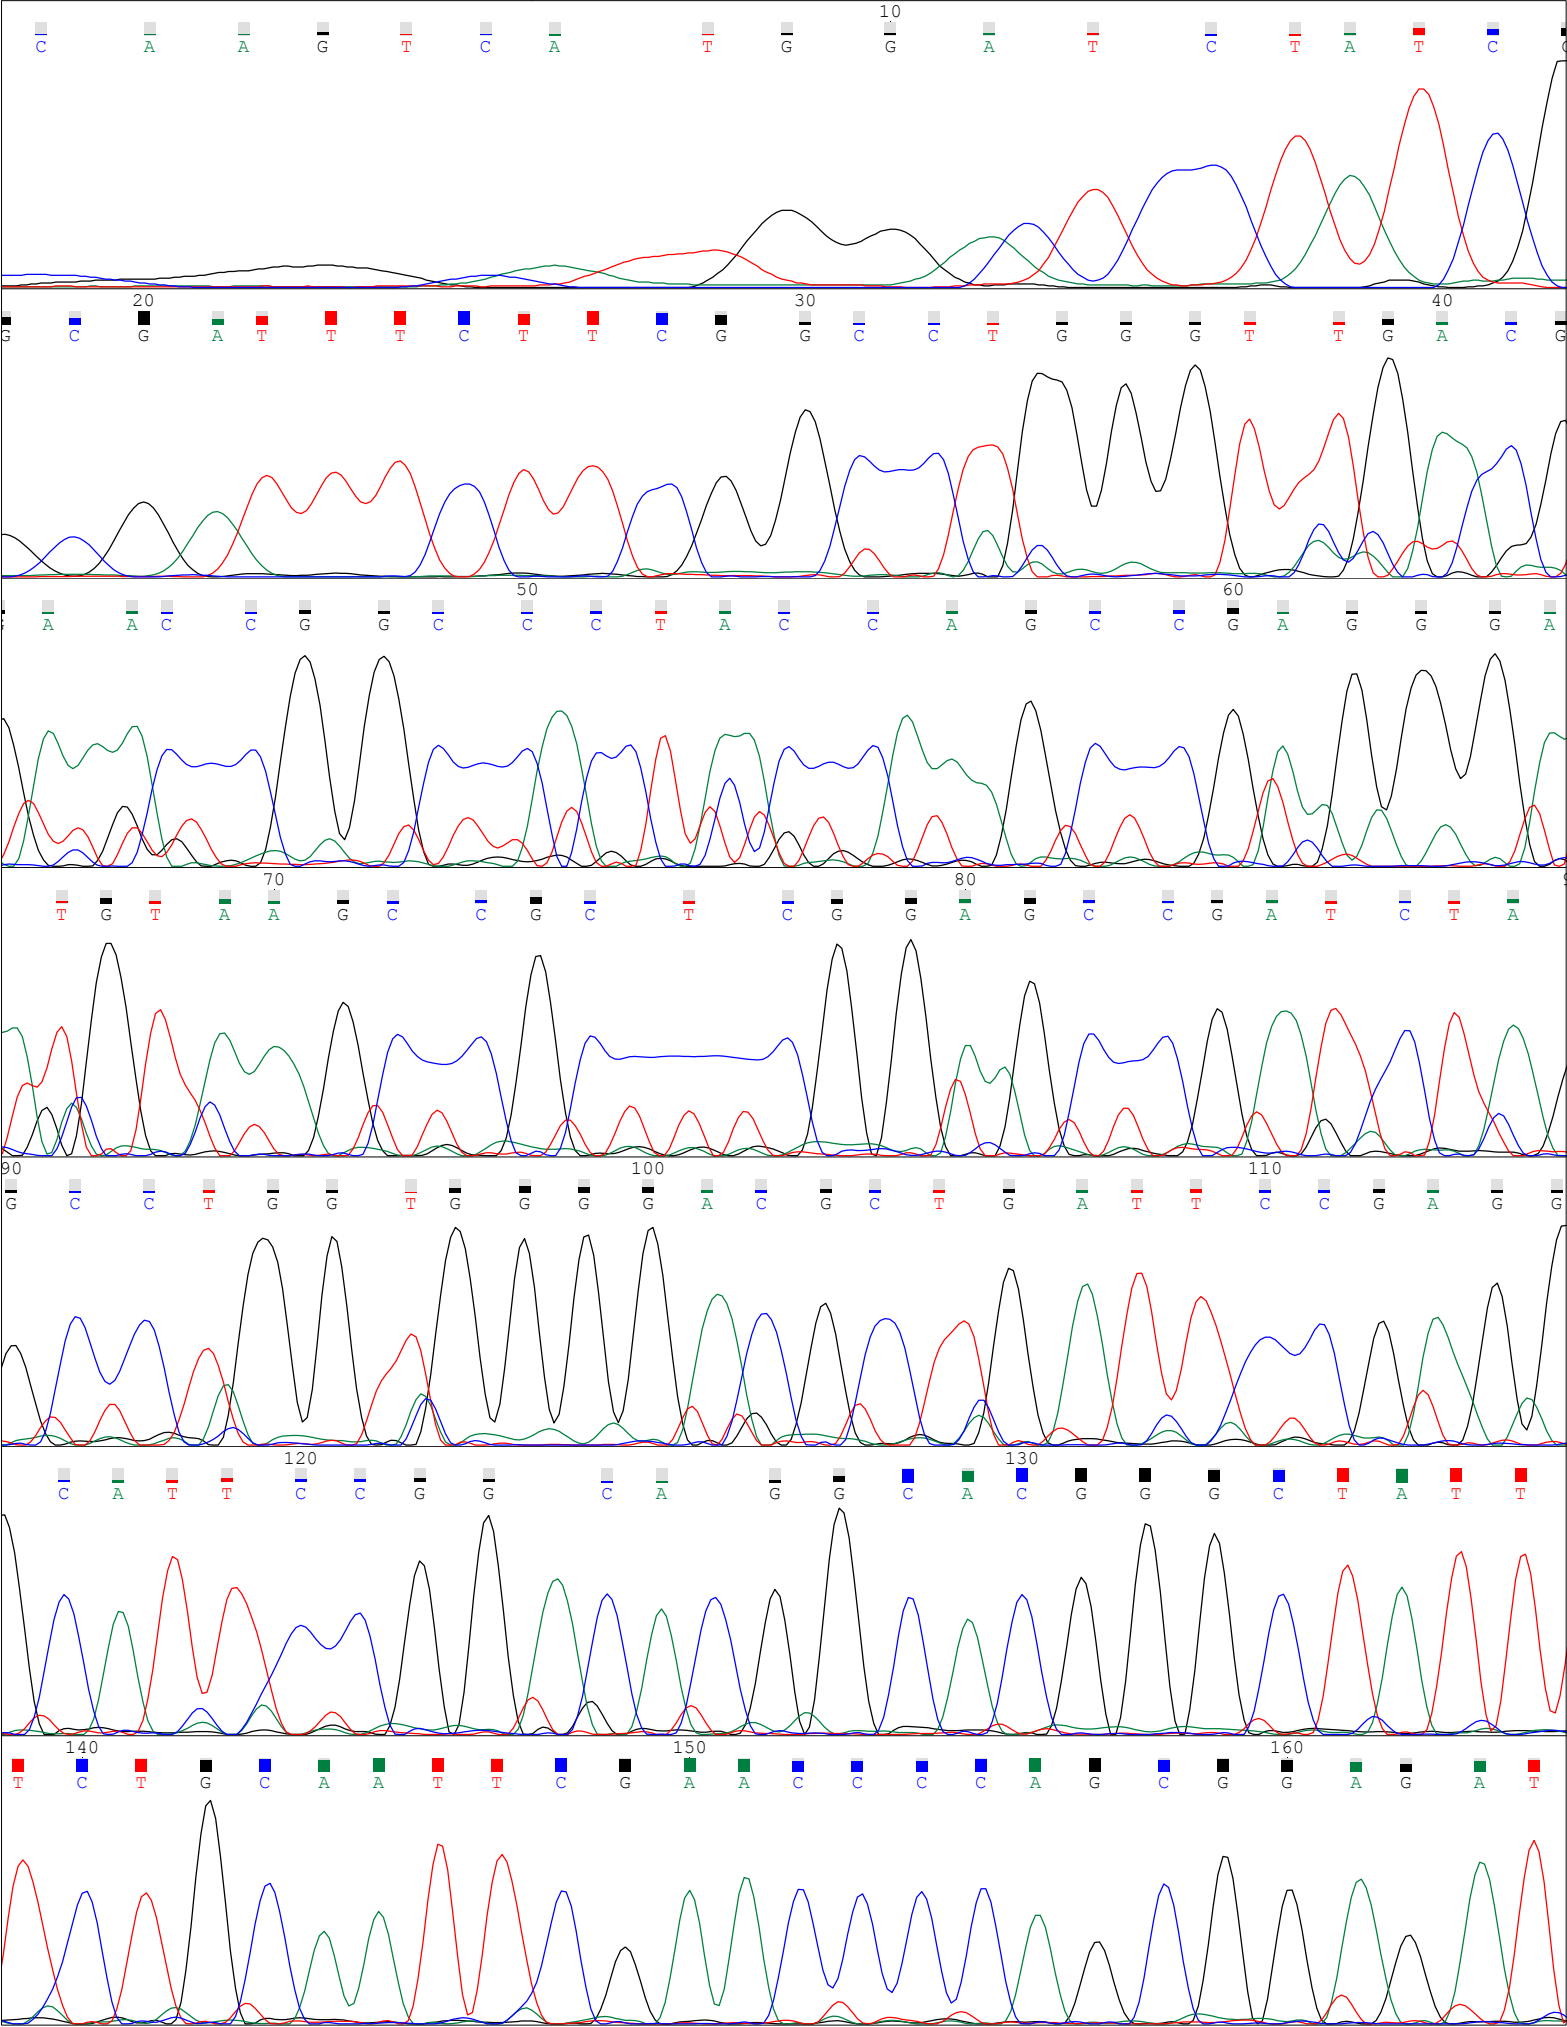

File: mutΔrifKatt1\_cI3-LS172.ab1  
Signal G:13771 A:15173 T:11163 C:19261  
Sample: mutΔrifKatt1\_cI3-LS172  
309 bases in 3978 scans

Run Ended: Jan 7, 2021, 1:21:10  
Comment: 2389291-A01-EmmanuelleDarbon-50-463277508-ED3  
Lane: 15 Base spacing: 14.45  
Page 2 of 2

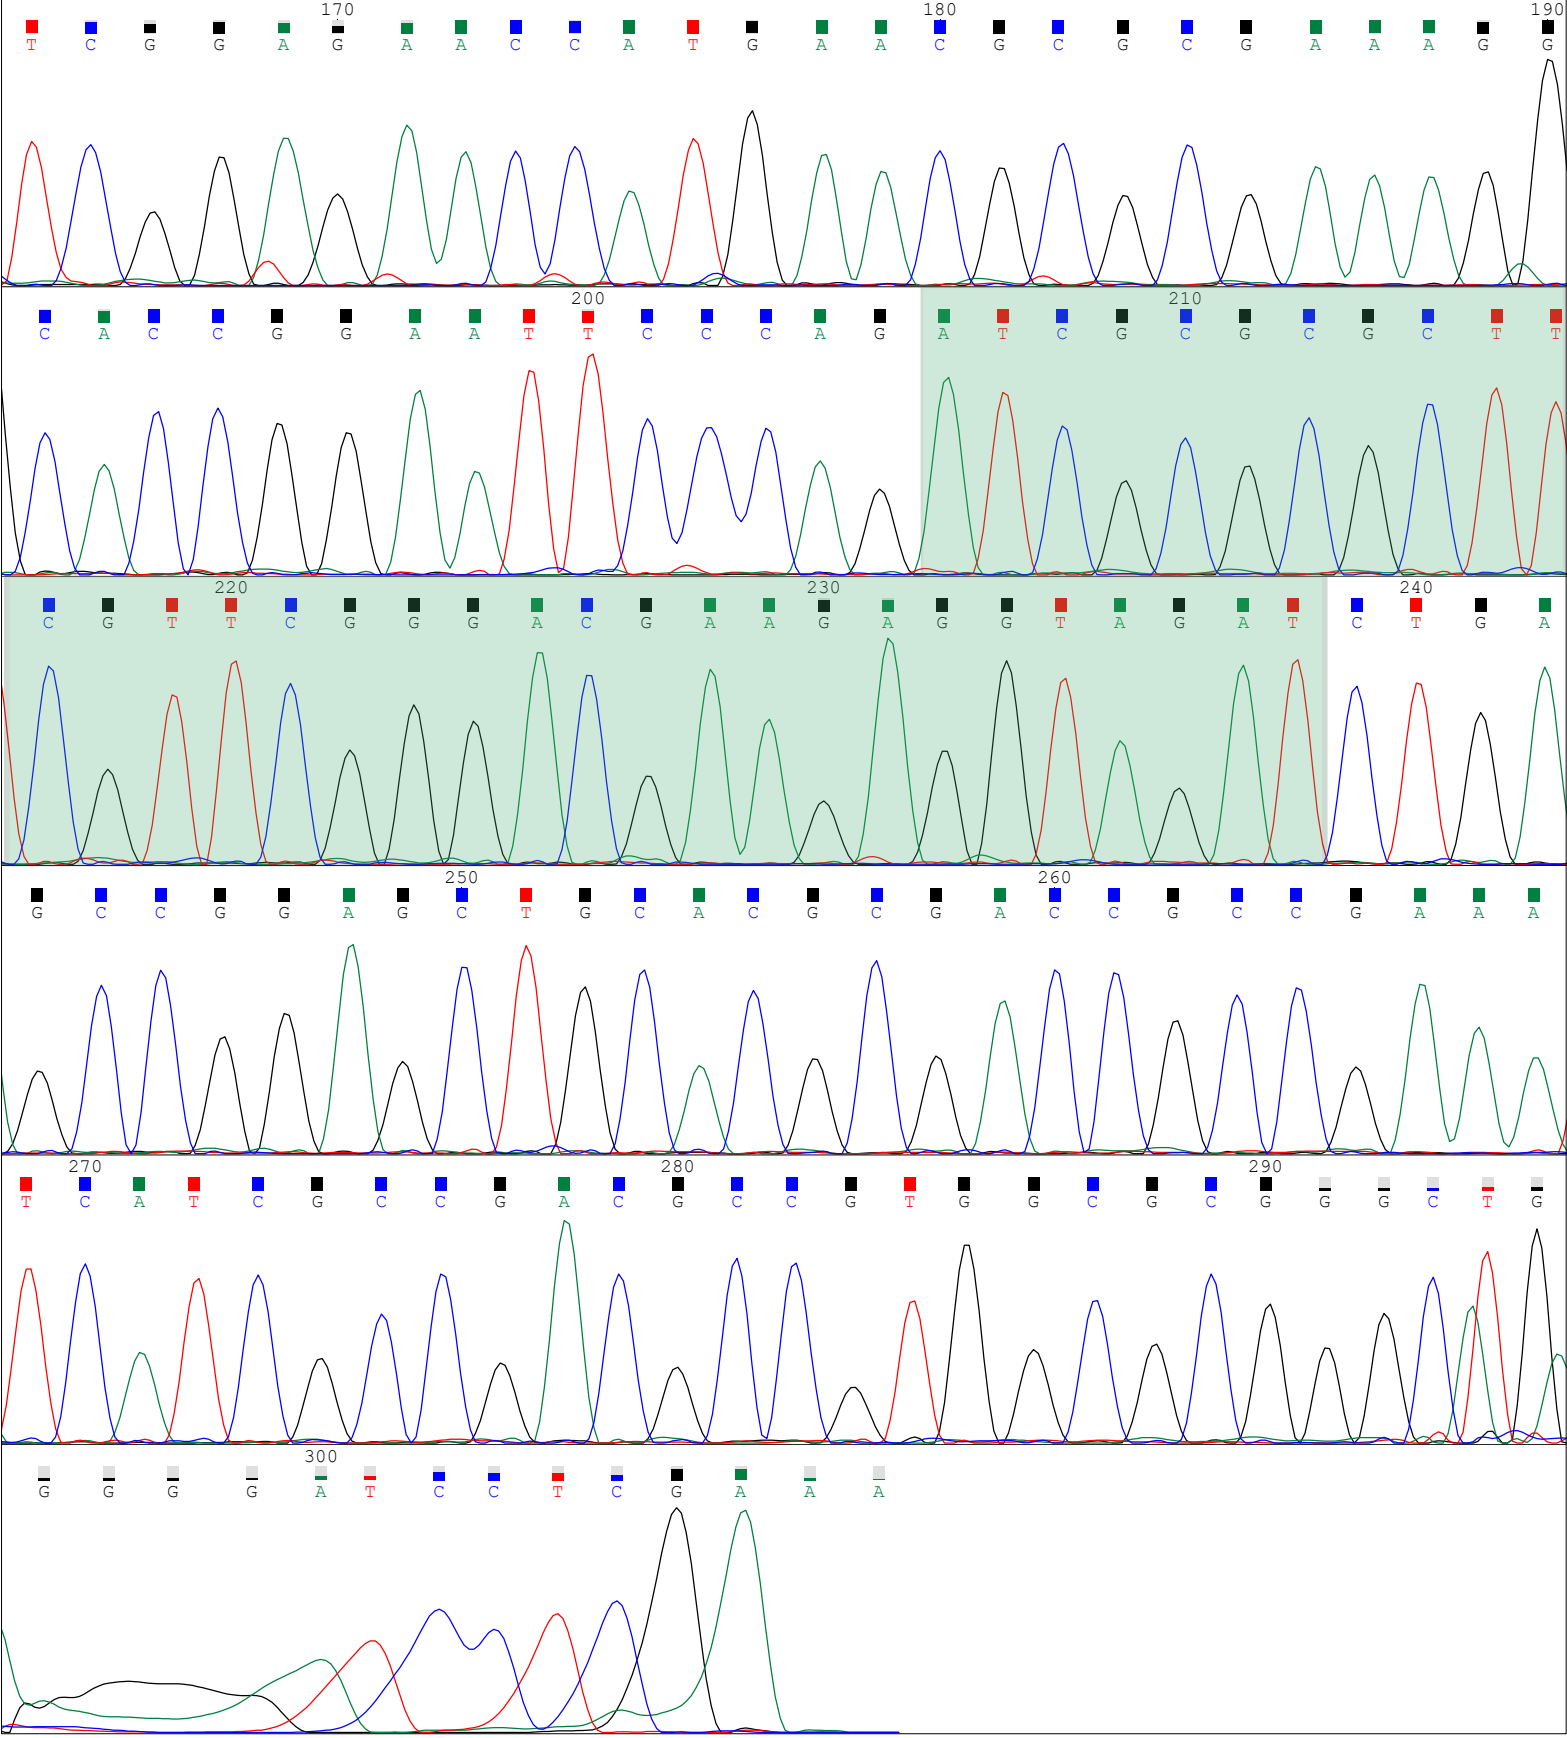

Supplement: s1 [file s1]
