# Supplementary material for: Marker-Free Genome Engineering in Amycolatopsis Using the pSAM2 Site-Specific Recombination System
Source: MDPI journal article supplement (doi:10.3390/microorganisms10040828), 2022-04-16
Supplement: s1 [file s1]

**Table S1.** Oligonucleotides used in this study.

| Name   | Sequence <sup>§</sup>                | Description                                                                                                                                     |
|--------|--------------------------------------|-------------------------------------------------------------------------------------------------------------------------------------------------|
| EDM79  | TCCGTCTTGGGCTCAACCT                  | Sequencing of pEA01                                                                                                                             |
| EDM80  | GTTAGCGGCGTGGAAGCGTC                 | Sequencing of pEA01                                                                                                                             |
| EDM81  | ATCGGGTGGCTAGGTGAAGA                 | Sequencing of pEA01                                                                                                                             |
| EDM82  | GAGCGCCTGATGCGGTATTT                 | Sequencing of pEA01                                                                                                                             |
| EDM83  | GAGCAAGGTGAGATGACAGG                 | Sequencing of pEA01                                                                                                                             |
| EDM84  | TGATGACCTGGCCGCTGTTC                 | Sequencing of pEA01                                                                                                                             |
| EDM85  | GTGAAGCACAGCTCGACCAT                 | Sequencing of pEA01                                                                                                                             |
| EDM86  | CAGGACTTCCTGGGCCGACT                 | Sequencing of pEA01                                                                                                                             |
| EDM87  | TTTGCGCGTCGGGCGCGTCC                 | Sequencing of pEA01                                                                                                                             |
| EDM88  | CAGATAGCCCAGTAGCTGAC                 | Sequencing of pEA01                                                                                                                             |
| EDM89  | GCGCGGACGCGGTCTGTGGA                 | Sequencing of pEA01                                                                                                                             |
| EDM90  | CACGTGGACACCGCAGGGAC                 | Sequencing of pEA01                                                                                                                             |
| EDM101 | AGAGTTGGTAGCTCTTGATC                 | Sequencing of pEA01                                                                                                                             |
| EDM102 | GGCTGGTTGTCACTGATCGA                 | Sequencing of pEA01                                                                                                                             |
| EDM103 | CCCGCAGCGCCCGACCGAAA                 | Sequencing of pEA01                                                                                                                             |
| EDM104 | TGCCGTCCATGACCACAGCG                 | Sequencing of pEA01                                                                                                                             |
| EDM105 | AGACCGTAGGCAAGCCAGTC                 | Sequencing of pEA01                                                                                                                             |
| EDM106 | CGCTCACAATTCCACACATT                 | Sequencing of pEA01                                                                                                                             |
| EDM107 | ACTGGCTTTCTACGTGTTCC                 | Sequencing of pEA01                                                                                                                             |
| EDM108 | GACATCGGCAAGGTGTGGGT                 | Sequencing of pEA01                                                                                                                             |
| LC18   | CGACATCAACCTCTGATTCC                 | Sequencing of pEA01                                                                                                                             |
| LS148  | TTGCCACCGCGCTCATCAATC                | Sequencing of pEA01                                                                                                                             |
| LS149  | ACTGGAAAGCGGGCAGTGAG                 | Sequencing of pEA02                                                                                                                             |
| LS150  | ATTCAGTGCAATTTATCTCTTC               | Sequencing of pEA03                                                                                                                             |
| LS151  | <u>GGATCCT</u> GCGCGGATGGGCGAAG      | Amplification of the upstream homologous arm of <i>rifK</i>                                                                                     |
| LS152  | CAGCTGGGAATTCGGTGCCTTTCC             |                                                                                                                                                 |
| LS153  | <u>CAGCTG</u> AGCCGGAGCTGCACGCGACC   | Amplification of the downstream homologous arm of <i>rifK</i>                                                                                   |
| LS154  | <u>AAGCTT</u> GAGCTCGCCGATGTCGTCC    |                                                                                                                                                 |
| LS155  | <u>GCGGCCG</u> CATCACACCGACGATGGAG   | Amplification of the upstream homologous arm of the <i>rif</i> cluster                                                                          |
| LS156  | <u>GATATC</u> CGGTGGGAGCCATTACCAAC   |                                                                                                                                                 |
| LS157  | <u>GATATC</u> GTGGAAGGTGTTCTCGTAGG   | Amplification of the downstream homologous arm of the <i>rif</i> cluster                                                                        |
| LS158  | <u>ATGCATC</u> AGCTATGAGCGACTGTCAAGG |                                                                                                                                                 |
| LS161  | CTGCAGATCTCCCGGCTCGTC                | Couple of primers used to amplify the upstream junction created by replacement of <i>rifK</i> by the att1 <i>hyg</i> cassette (PCR 1 Figure 2)  |
| LS182  | GGAGGAGACCGCACGGTTG                  |                                                                                                                                                 |
| LS188  | CGCCCGTGGAAGGTGAGTGTC                | Couple of primers used to amplify the downstream junction formed by replacement of <i>rifK</i> by the att1 <i>hyg</i> cassette (PCR 2 Figure 2) |
| LS189  | GCGAGGTCGTCCTCGGCACTG                |                                                                                                                                                 |
| LS172  | GACGTCCATTACGGCAGCCA                 | Couple of primers used to verify the excision of the hygromycin cassette (PCR 3 Figure 2)                                                       |
| LS173  | CGCTCATGCCCCGCGCCACG                 |                                                                                                                                                 |
| LS71   | GAGAAGCACACTGGCCCAAG                 | Couple of primer used to verify the integration of pRIF12 upstream of the <i>rif</i> cluster (PCR 1 Figure 3)                                   |
| LS190  | CGCACCGACACGAAGAAGAC                 |                                                                                                                                                 |
| LS191  | CACTGGAACGACTGGATCTG                 | Couple of primer used to verify the integration of pRIF14 downstream of the <i>rif</i> cluster (PCR 2 Figure 3)                                 |
| LS70   | CGCGATAGTCACGCAGATAG                 |                                                                                                                                                 |
| LS220  | AGCGTGGGAGCAGCGTAAGC                 | Couple of primers used to verify the excision of the <i>rif</i> cluster (PCR 3 Figure 3)                                                        |
| LS221  | CTCCCGTCACGGCACCCAAC                 |                                                                                                                                                 |

<sup>§</sup>Restriction sites added and used for cloning are underlined.
