# Supplementary material for: Marker-Free Genome Engineering in Amycolatopsis Using the pSAM2 Site-Specific Recombination System
Source: Microorganisms. 2022 Apr 16;10(4):828. doi: 10.3390/microorganisms10040828 (PMC9033027; doi:10.3390/microorganisms10040828)
Supplement: Supplementary file 1 [file microorganisms-10-00828-s001.zip]

Archive with 4 entries (4 files):
- Figure S1. Large-scale marker-free deletions using the pSAM2 SSR system.pdf
- File S1 - Sequence data of marker-free rifK cluster mutants.pdf
- File S2 - Sequence data of marker-free rif cluster mutants.pdf
- Table S1. Oligonucleotides used in this study.pdf
